# Supplementary material for: CW-Tau fights proteinopathy by improving autophagy and diminishing Tau seeding activity
Source: Research Square preprint supplement (doi:10.21203/rs.3.rs-6725217/v1), 2025-05-29
Supplement: Supplementary file 1 [file 33d787fff4f6a67550ccc261.docx]

1. Extended materials and methods

3.1 Human brain samples

Frontal cortex brain samples from sporadic Alzheimer’s disease patients and control subjects were kindly provided by Dr. Isidro Ferrer from HUB-IDIBELL-University of Barcelona Brain Bank, Spain.

3.2 W-Tau peptide

The newly described Tau isoform [1], which includes the translation of intron 12 up to the first stop codon, has been termed CW-Tau due to the presence of two characteristic tryptophan residues (W) in this isoform. The peptide expressed from the retained intron 12, along with the last two lysines encoded by exon 12, has been named the W-Tau peptide. The W-Tau peptide comprising the unique W-Tau sequence (KKVKGVGWVGCCPWVYGH) was obtained from Abyntek Biopharma S.L. (Parque Tecnológico de Bizkaia. Vizcaya, Spain).

3.3 Affinity chromatography

This method was used to assay the binding between W-Tau peptide and human brain extract. Affinity chromatography was performed using the protocol described previously [2] with some modifications as follows: CNBr-activated Sepharose 4B was purchased from Sigma (USA). The medium was prepared following the manufacturer’s instructions. One mg of the synthetic peptide was mixed with 0.3 g of CNBr-activated Sepharose 4B in a buffer which contained 0.1 M-NaHCO3, pH 8.5, and 0.5 M-NaCl. The mixture was incubated and gently agitated for 1.5 h, and the coupling of the peptide to the resin was stopped by the addition of 0.1 M-Tris, pH 8.0. The resin was washed and equilibrated with buffer A (0.1 M-Mes (pH 6.4)/0.5 mM-MgCl2/2 mM-EGTA). One mg of human brain extract dialyzed in buffer A was added to the column. The exclusion volume was collected in aliquots and analyzed by immunoblotting. The resin was washed and equilibrated again with buffer A in order to remove the excess protein that was not bound. The protein bound to the column was eluted by addition of 0.5 M-NaCl in buffer A and collected in 250-μl aliquots for analysis.

3.4 Protein fractionation by gel electrophoresis

Proteins were then separated on 10% sodium dodecyl sulfate-polyacrylamide gels before being transferred electrophoretically onto polyvinylidene difluoride membranes (GE Healthcare, UK) to be stained with red ponceau.

3.5 In-Gel digestion (Stacking gel)

The protein extracts, were suspended in a volume up to 50 μl of sample buffer, and then applied onto 1.2-cm wide wells of a conventional SDS-PAGE gel (0.75 mm-thick, 4% stacking, and 10% resolving). Then run was stopped as soon as the front entered 3 mm into the resolving gel, so that the whole proteome became concentrated in the stacking/resolving gel interface. The unseparated protein bands were visualized by Coomassie staining, excised, cut into cubes (2 x 2 mm), and placed in 0.5 ml microcentrifuge tubes [3]. The gel pieces were destained in acetonitrile:water (ACN:H2O, 1:1), were reduced and alkylated (disulfide bonds from cysteinyl residues were reduced with 10 mM DTT for 1 h at 56 ºC, and then thiol groups were alkylated with 10 mM iodoacetamide for 30 min at room temperature in darkness) and digested in situ with sequencing grade trypsin (Promega, Madison, WI) as described by Shevchenko et al. [4] with minor modifications. The gel pieces were shrunk by removing all liquid using sufficient ACN. Acetonitrile was pipetted out and the gel pieces were dried in a speedvac. The dried gel pieces were re-swollen in 100 mM Tris-HCl pH 8, 10mM CaCl2 with 60 ng/μl trypsin at 5:1 protein:enzyme (w/w) ratio. The tubes were kept in ice for 2 h and incubated at 37°C for 12 h. Digestion was stopped by the addition of 1% TFA. Whole supernatants were dried down and then desalted onto OMIX Pipette tips C18 (Agilent Technologies) until the mass spectrometric analysis.

3.6 Reverse phase-liquid chromatography RP-LC-MS/MS analysis (Dynamic Exclusion Mode)

Equal amount of protein, from the control and AD samples, non-retained or retained in the W-Tau peptide affinity chromatography were concentrated at the interface between stacking and separating cells [5] and digested in gel with trypsin as indicated above. The desalted protein digest was dried, resuspended in 10 μl of 0.1% formic acid and analyzed by RP-LC-MS/MS in an Easy-nLC 1200 system coupled to an ion trap LTQ-Orbitrap-Velos-Pro hybrid mass spectrometer (Thermo Scientific). The peptides were concentrated (on-line) by reverse phase chromatography using a 0.1mm × 20 mm C18 RP precolumn (Thermo Scientific), and then separated using a 0.075mm x 250 mm C18 RP column (Phenomenex) operating at 0.25 μl/min. Peptides were eluted using a 120-min dual gradient. The gradient profile was set as follows: 5−25% solvent B for 90 min, 25−40% solvent B for 30 min, 40−100% solvent B for 2min and 100% solvent B for 18 min (Solvent A: 0,1% formic acid in water, solvent B: 0,1% formic acid, 80% acetonitrile in water). ESI ionization was done using a Nano-bore emitters Stainless Steel ID 30 μm (Proxeon) interface at 2.1 kV spray voltage with S-Lens of 60%. The Orbitrap resolution was set at 30.000 [6].

Peptides were detected in survey scans from 400 to 1600 amu (1 μscan), followed by twenty data dependent MS/MS scans (Top 20), using an isolation width of 2 u (in mass-to-charge ratio units), normalized collision energy of 35%, and dynamic exclusion applied for 60 seconds periods. Charge-state screening was enabled to reject unassigned and singly charged protonated ions.

LC-MS/MS data was related to the database (uniprot-homo-sapiens) with PEAKSXPro software to identify the obtained peptides into their corresponding proteins.

3.7 Data processing: PEAKS Studio XPro

Peptide identification from raw data was carried out using PEAKS Studio XPro search engine (Bioinformatics Solutions Inc., Waterloo, Ontario, Canada). Database search was performed uniprot-homo-sapiens.fasta (78120 entries; UniProt release 03/2021) (decoy-fusion database). The following constraints were used for the searches: tryptic cleavage after Arg and Lys (semispecific), up to two missed cleavage sites, and tolerances of 20 ppm for precursor ions and 0.6 Da for MS/MS fragment ions and the searches were performed allowing optional Met oxidation and Cys carbamidomethylation. False discovery rates (FDR) for peptide spectrum matches (PSM) and for protein were limited to 0.01. Only those proteins with at least two unique peptides being discovered from LC/MS/MS analyses were considered reliably identified [7-9].

From the raw data of tryptic peptides showing affinity for the W-Tau peptide, a guided search was conducted to identify proteins involved in the “macroautophagy”, “vesicle trafficking”, “lysosome”, and “exportation” pathways using functional protein association network STRING database (https://string-db.org/).

3.8 Binding of W-Tau peptide to microtubules

Microtubules were purified from wild type C57 mouse brains and polymerized, as previously described [10] in the presence or absence of W-Tau peptide. After MT polymerization, the polymerized protein was centrifuged and the presence of W-Tau peptide (Abyntek Biopharma S.L., Parque Tecnológico de Bizkaia. Vizcaya, Spain) in the pelleted protein was analyzed. W-Tau peptide). Peptide was dissolved in sterile Milli-Q distilled water.

Mouse brains were obtained from wild type mice C57 and kept in ice during the process. Homogenized in Isotonic Buffer 1.5ml per gram (0.32M Sacarose, 1mM EGTA, 1 mM MgCl2, 10 mM phosphate buffer pH 7 and 1 mM PMSF) and centrifuge at 100000g on a TL100.3 rotor 40 min at 4oC. Supernatant was collected and mixed with Buffer Ax1 (0.1 M MES pH 6.7, 2 mM EGTA and 0.5 mM MgCl2), Glycerol 30%, 0.5-1 mM GTP and 1 mM PMSF was added to the mix and incubated at 37ºC for 30 min. Centrifuged at 30ºC, 100000g for 1 hour. Resuspended pellet in 500 μl Buffer Ax1, 50 μl GTP, 60 μl DMSO, 7 μl PMSF, and 1 mg/ml of the peptide. Incubated for 30 min at 37ºC in agitation and centrifuge for 90 min at 25ºC, 100000g on a TLA45 Resuspended pellet in 100 µl of Buffer A1x, boiled for 10 min and centrifuge in Airfuge for 30 min at 28000 psi. The supernatant was taken, and volume diluted in 1:10 and 1:100 in Buffer Ax1. The presence of the W-Tau peptide was analyzed after dot blot of 10 μl of each mixture by using anti-CW-Tau antibody synthesized by Abyntek Biopharma S.L. (Parque Tecnológico de Bizkaia. Vizcaya, Spain) [1] .

For microscopy visualization, 10 μl of Control and W-Tau peptide mixes were taken. Glutaraldehyde 0.1% was added at room temperature for 10 min. Fixation was blocked with Glycine 10% and adsorb to 400 MEs Copper Collodion grids ionized in BAE 120 Evaporator (Bal-Tec) for 30 min. Grids were stained in Uranyl Acetate for 40 s Visualization was performed in JEM1400 Flash Transmission Electron Microscope (Jeol).

3.9 Lactate dehydrogenase aggregation

LDH (50 nM) was incubated with W-Tau peptide at different molar ratios (LDH/ W-Tau peptide) at 80ºC for 100 sec without agitation in PBS 1x containing 1 mM DTT. Total volume (10 μl) was visualized in JEM1400 Flash Transmission Electron Microscope (Jeol), after 5 min adsorption to 400 MES Copper Collodion grids ionized in BAE 120 Evaporator (Bal-Tec) for 30 min, cleaned with miliQ water and stained for 40 sec in uranyl acetate. Visualization was performed in JEM1400 Flash Transmission Electron Microscope (Jeol)

3.10 Cell Cultures

SH-SY5Y (CRL-2266, ATCC), HEK293T (CRL-11268, ATCC) and HEK293T Tau RD P301S FRET Biosensor (CRL-3275, ATTC) cell lines were cultured in DMEM (Dulbecco’s Modified Eagle’s Medium; with 4 mM L-glutamine, 4500 mg/L glucose, 1 mM sodium pyruvate, and 1500 mg/L sodium bicarbonate) supplemented with 10% fetal bovine serum, 2 mM glutamine, 2 mM non-essential amino acids, 10 U/mL penicillin, and 10 μg/mL streptomycin.

3.11 Lentiviriral Infection

Lentiviral vectors based on pWPI backbone (Addgene plasmid #12254) encoding the isoforms T30 (kindly provided by Kenneth Kosik, UC Santa Barbara, California), CW-T30 (TIR-30) (cloned in our laboratory), and GFP (Addgene plasmid #12255) containing an IRES followed by GFP were packaged and tittered as previously described [11]. SH-SY5Y cells were infected at a multiplicity of infection (MOI) of 2.5 Infective Units (IU) per cell. After 24 hours, the cells were replated onto coverslips in M24 plates pre-coated with Matrigel (45354248, Cultek). After 48 h, the cells were fixed with 4% paraformaldehyde for 10 minutes.

3.12 Immunofluorescence Assay

The previously fixed cells were permeabilized for 10 minutes in PBS (pH 7.4) containing 0.1% SDS. Following permeabilization, the cells were incubated for 30 minutes in a blocking solution of PBS (pH 7.4) supplemented with 1% Fetal Bovine Serum (FBS) and 0.1% Triton X-100. The cells were then incubated overnight at 4ºC with primary antibody diluted in blocking solution. After washing with PBS, the samples were incubated for 1 h at room temperature with secondary antibodies. The cell nuclei were counterstained with DAPI (4',6-diamidino-2-phenylindole; 1:5000, Merck, 268298) for 10 minutes at room temperature. Finally, the samples were mounted using a FluorSave ReagentTM (Merck, 345789).

The cells were observed using a LSM900 scanning confocal microscope coupled with an Axio Imager 2 vertical microscope (Zeiss), and quantified using Fiji software [12]. Images were acquired through Z-stacking (layer thickness 0.5 nm, layer jump every 0.5 nm) using a 63X objective, and the plane with the highest intensity was selected for quantitative analysis. A total of 500 cells from randomly selected fields were counted, with DAPI staining used to identify and quantify cell nuclei as positive images in the blue channel. Subsequently, the number of cells positive for the antibody of interest was determined by identifying cells that exhibited a signal in the red or white channel surrounding each nucleus. The intensity of the channel of interest was quantified for the study of Tau isoforms, and the number of puncta was assessed for the vesicular trafficking study. These measurements were normalized to the number of cells in the selected field or evaluated in relation to the kurtosis value, a statistical measure of data distribution shape compared to a normal distribution. For LAMP1 and Lysotracker vesicle size and number analysis, vesicles were segmented using *CellPose* Fiji Plug-in, followed by area classification. During image acquisition and quantification, saturation points were avoided. However, for graphical representation, the contrast of some image sets (particularly the red channel) was enhanced to improve visualization.

The following primary antibodies were used: GFP chicken, 1:1000 (ABCAM, 13970), Tau rabbit, 1:200 (NUVUSBIO, NB100-822247), LC3 mouse 1:1000 (SIGMA, L7543), EEA1 mouse, 1:1000 (BD Biosciences, 610457), Rab11A1 rabbit 1:200 (Invitrogen, 71-5300), CD63 mouse, 1:1000 (DSHB, H5C6), LAMP1, 1:1000 (DSHB, H4A3), and the following secondary antibodies: Anti-Chicken Alexa Fluor 488, 1:1000 (ThermoFisher, A11039), Anti-rabbit Alexa Fluor 555, 1:1000 (Thermofisher, A-315772), and Anti-mouse Alexa Fluor 647 1:1000 (ThermoFisher, A-31571). Cells were treated with LysotrackerRed DND-99 (Invitrogen, L7528) for 20 min before fixing for the detection of acidic compartments.

2.13 Study of Autophagy Modulation

To assess the modulation of autophagy by different Tau isoforms, cells were treated with CCCP (carbonyl cyanide m-chlorophenyl hydrazone; Sigma-Aldrich, C2759), a respiratory chain uncoupler that induces mitophagy, and bafilomycin A1 (Santa Cruz Biotechnology, SC-201550), a vacuolar ATPase inhibitor that binds to the autophagosome and halts autophagy.

HEK293T cells were transfected with either the pSG5 empty eukaryotic expression vector (Agilent, 216201) or vectors encoding the Tau isoforms T30 or CW-T30, which had been previously cloned in the laboratory. Transfections were performed using Lipofectamine and Plus reagent (Life Technologies, 18324 and 11514, respectively) following the manufacturer's instructions. After 48 hours, cells were cultured in the presence of 5 μM CCCP for 24 hours, 200 nM bafilomycin A1 for the final 6 hours, a combination of both treatments, or left untreated as a control.

The cells were harvested, and the pellets were resuspended in total extraction buffer (50 mM Tris–HCl pH 7.5; 300 mM NaCl, 0.5% sodium dodecyl sulfate (SDS), and 1% Triton X-100) as previously described. Total protein concentration was determined using the DC Protein Assay kit (BioRad), and 30 μg of protein from each condition were subjected to Western blot analysis on 10-12% polyacrylamide gels, which were transferred to nitrocellulose or PVDF membranes (for LC3) as previously described. The membranes were probed with antibodies against LC3 to quantify the number of autophagic vesicles and p62 as a measure of autophagy. Tau5 and CW-Tau antibodies were used to confirm the successful transfection of Tau isoforms and to assess the specificity of CW-Tau. Additionally, an anti-actin antibody served as a loading control. The synthesis and degradation ratios of LC3 and p62 were quantified, with "accumulation" being the preferred term for p62 as per the most recent autophagy guidelines [13]. The quantification was performed using the equations outlined in these guidelines to evaluate autophagic flux and the effects of Tau isoforms on autophagy [13]:

*Synthesis* ;

For Western blot, the following primary antibodies were used: Tau 5 mouse, 1:1000 (Calbiochem, 577801), LC3 mouse, 1:1500 (SIGMA, L7543), p62 mouse, 1:1500 (BDT Labs, 610832), and ß-actin mouse, 1:5000 (SIGMA, A5441), and the following secondary antibody: Anti-mouse HRP, 1:2000 (DAKO, P0448).

3.14 Protein Aggregation assays

HEK293T cells overexpressing different Tau isoforms were treated with 200 nM Bafilomycin A1 (Santa Cruz Biotechnology, SC-201550), a specific inhibitor of the vacuolar ATPase that blocks autophagic degradation, and 5 µM MG-132 (provided in the Proteostat Aggresome Detection Kit, Enzo Life Sciences, 51023), a proteasome inhibitor, for 6 hours. Subsequently, cells were fixed with 4% paraformaldehyde for 20 minutes and then washed with phosphate-buffered saline (PBS). To permeabilize the cells, they were incubated with 0.5% Triton X-100 and 3 mM EDTA (pH 8.0) in 1X assay buffer from the Proteostat Aggresome Detection Kit for 30 minutes. After permeabilization, cells were washed twice with PBS. Following the removal of PBS, 20 μL of a mixture containing Proteostat Detection Reagent (diluted 1:1000) and Hoechst 33342 (500 ng/mL; ThermoFisher, Courtaboeuf, France) in 1X assay buffer was manually added to the cells. After a 30-minute incubation in the dark, the wells were washed three times with PBS. A total of 200 cells from randomly selected fields were analyzed by counting the number of puncta for the Proteostat aggresome detection.

3.15 Determination of Tau exportation in exovesicles

HEK293T (CRL-11268, ATCC) cells were transfected with eukaryotic expression vector pSG5 (216201, Agilent) encoding Tau isoforms (T30 or CW-T30) [14] using Lipofectamine and Plus Reagent (18324 y 11514, respectively – Life Technologies) according to the supplier’s guidelines. After 48h, cells were washed twice with PBS and medium was replaced with DMEM without serum. After an additional 18 hours, medium was collected and subjected to a series of centrifugation steps at 4ºC as previously described [15]. The first centrifugation at 300g for 10 min and the resulting supernatant was considered the extracellular fraction. This was followed by serial centrifugations of 2000g for 10 min and 10000g for 30 min and 100000g for 90 min. The supernatant of the last centrifuge was considered to contain naked Tau fraction. The pellet was then resuspended in PBS and subsequently centrifuged at 100000g for 90 min. The resulting pellet was resuspended in PBS and considered the exosome-enriched fraction. The presence of exosomes was confirmed using a Nanoparticle Tracking Analyser NanoSight (Malvern Panalytical). Tau content was detected in each fraction by Western blot analysis as previously described.

- 1. In vivo Tau Aggregation Assays

HEK293T Tau RD P301S FRET Biosensor (CRL-3275, ATTC) cells were transfected with purified tau seeds from Alzheimer’s disease human brains, as previously described [16], and pSG5 eukaryotic expression vector (216201, Agilent) encoding the different Tau isoforms (T30 and CW-T30) previously cloned in the laboratory, were transfected using Lipofectamine 2000 reagent (11668027, Invitrogen) according to the manufacturer's instructions. After 72h of transfection, cells were fixed with 4% paraformaldehyde for 10 minutes and directly observed using a confocal microscope under the same conditions as the immunofluorescence assays. In another set of experiments, 24h after transfection with Tau seeds, cells were treated with various amounts of extracellular medium clarified by centrifugation (300g for 10 min), naked Tau-enriched fraction or exosome-enriched fraction obtained using Simon *et al*’s protocol [15], as previously described. Cells were similarly fixed 72h post-transfection and were mounted using a FluorSave ReagentTM (Merck, 345789). Cells were observed using a LSM900 scanning confocal microscope coupled with an Axio Imager 2 vertical microscope (Zeiss) and quantified using Fiji software [12]. Images were acquired using a 63X objective. For further quantification of the images, the mean signal intensity was measured after selecting a threshold for only positive FRET signal. Measurements were normalized using both negative to subtract background and positive control to create a ratio before proceeding with statistical analysis.

*3.17 Statistical Analysis*

The data extracted from the experiments were analyzed and represented using GraphPad Prism 9.0 (GraphPad Software, Inc.) and Excel (Microsoft Office). All data groups are expressed as mean ± SEM (standard error of the mean). Statistical comparisons were performed using one-way ANOVA for comparisons within a single group and two-way ANOVA for comparisons between two groups, utilizing GraphPad Prism 9.0. The differences between groups are graphically represented as follows: ns not significant, * p ≤ 0.05, ** p ≤ 0.01, *** p ≤ 0.001, and **** p ≤ 0.0001.

**Bibliography**

1. Garcia-Escudero V, Ruiz-Gabarre D, Gargini R, Perez M, Garcia E, Cuadros R, et al. A new non-aggregative splicing isoform of human Tau is decreased in Alzheimer's disease. Acta Neuropathol. 2021 Jul;142(1):159-77.

2. Bolos M, Llorens-Martin M, Perea JR, Jurado-Arjona J, Rabano A, Hernandez F, et al. Absence of CX3CR1 impairs the internalization of Tau by microglia. Mol Neurodegener. 2017 Aug 15;12(1):59.

3. Moreno M, Escobar J, Gil A, Izquierdo-Álvarez A, Martínez-Ruíz A, Sastre J. Disulfide stress as a novel type of oxidative stress in acute inflammation. Free Radical Biology and Medicine. 2012;53:S39.

4. Shevchenko A, Wilm M, Vorm O, Mann M. Mass spectrometric sequencing of proteins from silver-stained polyacrylamide gels. Analytical chemistry. 1996;68(5):850-8.

5. Laemmli UK. Cleavage of structural proteins during the assembly of the head of bacteriophage T4. Nature. 1970 Aug 15;227(5259):680-5.

6. Alonso R, Pisa D, Marina AI, Morato E, Rabano A, Rodal I, et al. Evidence for fungal infection in cerebrospinal fluid and brain tissue from patients with amyotrophic lateral sclerosis. Int J Biol Sci. 2015;11(5):546-58.

7. Tran NH, Qiao R, Xin L, Chen X, Liu C, Zhang X, et al. Deep learning enables de novo peptide sequencing from data-independent-acquisition mass spectrometry. Nat Methods. 2019 Jan;16(1):63-6.

8. Tran NH, Rahman MZ, He L, Xin L, Shan B, Li M. Complete De Novo Assembly of Monoclonal Antibody Sequences. Sci Rep. 2016 Aug 26;6:31730.

9. Tran NH, Zhang X, Xin L, Shan B, Li M. De novo peptide sequencing by deep learning. Proc Natl Acad Sci U S A. 2017 Aug 1;114(31):8247-52.

10. Garcia-Rocha M, Avila J, Lozano J. The zeta isozyme of protein kinase C binds to tubulin through the pseudosubstrate domain. Exp Cell Res. 1997 Jan 10;230(1):1-8.

11. Martín-Maestro P, Gargini R, García E, Simón D, Ávila J, García-Escudero V. Mitophagy failure in APP and tau overexpression model of Alzheimer’s disease. Journal of Alzheimer's Disease. 2019;70(2):525-40.

12. Schindelin J, Arganda-Carreras I, Frise E, Kaynig V, Longair M, Pietzsch T, et al. Fiji: an open-source platform for biological-image analysis. Nature methods. 2012;9(7):676-82.

13. Klionsky DJ, Abdel-Aziz AK, Abdelfatah S, Abdellatif M, Abdoli A, Abel S, et al. Guidelines for the use and interpretation of assays for monitoring autophagy. autophagy. 2021;17(1):1-382.

14. García-Escudero V, Ruiz-Gabarre D, Gargini R, Pérez M, García E, Cuadros R, et al. A new non-aggregative splicing isoform of human Tau is decreased in Alzheimer’s disease. Acta Neuropathologica. 2021;142:159-77.

15. Simón D, García-García E, Royo F, Falcón-Pérez JM, Avila J. Proteostasis of tau. Tau overexpression results in its secretion via membrane vesicles. FEBS letters. 2012;586(1):47-54.

16. Dujardin S, Commins C, Lathuiliere A, Beerepoot P, Fernandes AR, Kamath TV, et al. Tau molecular diversity contributes to clinical heterogeneity in Alzheimer’s disease. Nature medicine. 2020;26(8):1256-63.
